# Supplementary material for: Adrenal Gland and Lung Lesions in Gulf of Mexico Common Bottlenose Dolphins (Tursiops truncatus) Found Dead following the Deepwater Horizon Oil Spill
Source: PLoS One. 2015 May 20;10(5):e0126538. doi: 10.1371/journal.pone.0126538 (PMC4439104; doi:10.1371/journal.pone.0126538)
Supplement: S1 Table — (XLSX) [file pone.0126538.s001.xlsx]

## Sheet: UME Histopath Study
NOAA Dataset for 'Adrenal gland and lung lesions in Gulf of Mexico common bottlenose dolphins (Tursiops truncatus) found dead following the Deepwater Horizon oil spill' (Venn-Watson et al. 2015)
Note: Blank fields are present when there were no data reported or no appropriate tissues available to test/evaluate
Case and Reference Scoring, Demographics & Carcass Condition											Adrenal Gland			Lung																											Lymphoid Organs						Central Nervous System
Study Group - UME Cases and References	Standardly Scored by Same Pathologist	Dolphin Field Identifier	Stranding State	Stranding County	Stranded in Barataria Bay, Louisiana	Observed Stranding Date	Observed Stranding Year	Total Body Length	Sex	Condition of Dolphin when Observed Stranded	Adrenal Gland Corticomedullary Ratio	Thick Adrenal Cortex (ratio > 0.838)	Thin Adrenal Cortex (ratio < 0.447)	Lung	Lung Fibrosis	Lung Fibrosis Severity	Lung Fibrosis Moderate to Severe	Lung Angiomatosis	Lung Angiomatosis Severity	Lung Granuloma	Lung Granuloma Active or Chronic	Lungworm	Pneumonia	Pneumonia Severity	Pneumonia Location	Bronchopneumonia	Lung - Eosinophilic Infiltrate	Lung - Granulomatous Infiltrate	Lung - Lymphoplasmacytic Infiltrate	Lung - Suppurative Infiltrate	Lung - Viral Infection	Lung - Suspected Virus	Lung - Confirmed Virus	Lung - Morbillivirus PCR Result	Lung - Bacterial Infection	Lung or Lung-associated Lymph Node - Brucella PCR Result	Lung - Fungal Infection	Lung - Suspected Fungus	Summary of Lung Inflammation Cause	Primary Bacterial Pneumonia	Splenic Lymphoid Depletion	Splenic Lymphoid Depletion Severity	Lymph Node Lymphoid Depletion	Lymph Node Lymphoid Depletion Severity	Lymph Node and Splenic Lymphoid Depletion	Reactive Lymph Nodes	Central Nervous System	Central Nervous System Inflammation (Meningitis/Meningoencephalitis)	Central Nervous System Inflammation Severity
Case	Yes	BP-2010-LA-168	LA	Cameron	No	2010-06-19	2010	223	Male	Alive (died thereafter)	0.296	No	Yes	Abnormal	Yes	Moderate	Yes	Yes	Moderate	Yes	Active	Present	Yes	Severe	Both	No	No	Yes	No	Yes	No			Negative	Yes	Negative	No		Primary bacterial	Yes	No		No		No	No	Abnormal	Yes	Severe
Case	Yes	70IMMS070810	AL	Baldwin	No	2010-07-08	2010	254	Male	Fresh dead	0.583	No	No	Abnormal	Yes	Moderate	Yes	Yes	Severe	No		Absent	Yes	Moderate	Bronchial	Yes	No	Yes	No	Yes	No			Negative	Yes	Negative	No		Primary bacterial	Yes			No			No	No significant findings	No
Case	Yes	71IMMS071110	MS	Harrison	No	2010-07-11	2010	240	Female	Fresh dead	0.524	No	No	Abnormal	Yes	Moderate	Yes	Yes	Severe	No		Absent	Yes	Mild	Interstitial	No	Yes	No	Yes	No	No			Negative	No	Negative	No		Primary lungworm	No	No		No		No	Yes	No significant findings	No
Case	Yes	76IMMS080510	MS	Harrison	No	2010-08-05	2010	141	Female	Fresh dead	0.615	No	No	Abnormal	Yes	Moderate	Yes	No		Yes	Chronic	Present	Yes	Moderate	Bronchial	Yes	No	Yes	Yes	Yes	No			Negative	Yes	Negative	Yes	Zygomycete	Mixed bacterial, fungal parasitic	No	No		No		No	Yes	No significant findings	No
Case	Yes	KAW20100822-LA001	LA	Terrebonne	No	2010-08-21	2010	180	Male	Fresh dead				Abnormal	Yes	Mild	No	No		Yes	Active	Present	Yes	Mild	Bronchial	Yes	No	Yes	No	Yes	No				No		No		Primary lungworm	No	No		No		No	No	No significant findings	No
Case	Yes	SDD-20100905-LA003	LA	Jefferson	Yes	2010-09-05	2010	188	Female	Fresh dead	0.762	No	No	Abnormal	Yes	Mild	No	No		Yes	Active	Present	Yes	Mild	Bronchial	Yes	Yes	Yes	No	Yes	No				No		No		Primary lungworm	No	No		No		No	Yes	No significant findings	No
Case	Yes	84IMMS102610	MS	Harrison	No	2010-10-26	2010	199	Female	Fresh dead	0.466	No	No	Abnormal	Yes	Mild	No	No		No		Absent	Yes	Moderate	Bronchial	Yes	No	Yes	Yes	Yes	No			Negative	Yes	Negative	No		Primary bacterial	Yes	No		No		No	Yes	No significant findings	No
Case	Yes	MCT-20101110-LA001	LA	Terrebonne	No	2010-11-10	2010	244	Female	Fresh dead	0.97	Yes	No	Abnormal	Yes	Mild	No	No		No		Present	Yes	Mild	Bronchial	Yes	No	Yes	No	No	No			Negative	No	Positive	No		Primary lungworm	No	Yes	Mild	Yes	Mild	Yes	No	Abnormal	Yes	Moderate
Case	Yes	SDD-20101120-LA001	LA	Plaquemines	Yes	2010-11-20	2010	185	Male	Alive (died thereafter)	0.438	No	Yes	Abnormal	Yes	Mild	No	Yes	Mild	Yes	Chronic	Absent	Yes	Mild	Bronchial	Yes	Yes	Yes	Yes	Yes	No			Negative	No		No		Primary lungworm	No	No		No		No	No	No significant findings	No
Case	Yes	MRB-20101218-LA001	LA	Jefferson	Yes	2010-12-18	2010	259	Female	Fresh dead	0.441	No	Yes	Abnormal	Yes	Moderate	Yes	Yes	Moderate	No		Absent	Yes	Moderate	Bronchial	Yes	No	No	No	Yes	No			Negative	Yes	Negative	No		Primary bacterial	Yes	Yes	Severe					No significant findings	No
Case	Yes	RIB-20110111-LA001	LA	Jefferson	Yes	2011-01-11	2011	244	Female	Fresh dead	0.267	No	Yes	Abnormal	Yes	Mild	No	No		No		Present	Yes	Mild	Bronchial	Yes	No	Yes	Yes	Yes	No			Negative	No	Negative	No		Primary lungworm	No	No		No		No	Yes
Case	Yes	RIB-20110111-LA002	LA	Jefferson	Yes	2011-01-11	2011	183	Female	Fresh dead	0.69	No	No	Abnormal	Yes	Moderate	Yes	No		Yes	Chronic	Absent	Yes	Moderate	Bronchial	Yes	No	Yes	Yes	No	No			Negative	No	Positive	No		Primary lungworm	No	No		No		No	Yes	No significant findings	No
Case	Yes	MB-20110125-LA001	LA	Jefferson	Yes	2011-01-25	2011	244	Female	Fresh dead				Abnormal	Yes	Mild	No	Yes	Moderate	No		Absent	No			No	No	No	No	No	No				No	Negative	No			No	Yes	Moderate	No		No	No	No significant findings	No
Case	Yes	SMM-20110128-LA001	LA	Jefferson	Yes	2011-01-28	2011	224	Male	Fresh dead	0.751	No	No	Abnormal	Yes	Mild	No	No		Yes	Chronic	Present	Yes	Mild	Interstitial	No	Yes	Yes	Yes	No	No			Negative	No	Negative	No		Primary lungworm	No	No		No		No	No	No significant findings	No
Case	Yes	MCT-20110228-LA001	LA	Jefferson	Yes	2011-02-28	2011	203	Male	Fresh dead	0.624	No	No	Abnormal	Yes	Mild	No	Yes	Mild	No		Absent	Yes	Mild	Bronchial	Yes	No	Yes	Yes	No	No			Negative	No	Negative	No		Primary lungworm	No			No			Yes	Abnormal	Yes	Severe
Case	Yes	63IMMS031711	MS	Jackson	No	2011-03-17	2011	172	Female	Fresh dead				Abnormal	Yes	Mild	No	No		No		Absent	Yes	Moderate	Both	No	No	Yes	No	Yes	Yes	Morbillivirus	Morbillivirus	Positive	No	Negative	No		Primary viral	No	Yes	Mild	No		No	Yes	Abnormal	Yes	Moderate
Case	Yes	90IMMS042311	MS	Harrison	No	2011-04-23	2011	184	Female	Fresh dead	0.623	No	No	Abnormal	Yes	Mild	No	No		Yes	Active	Present	Yes	Mild	Bronchial	Yes	Yes	Yes	No	No	No			Negative	No	Negative	No		Primary lungworm	No	Yes	Moderate	Yes	Moderate	Yes	No	No significant findings	No
Case	Yes	MRB-20110517-LA001	LA	Lafourche	Yes	2011-05-17	2011	244	Male	Fresh dead				Abnormal	Yes	Mild	No	Yes	Mild	No		Absent	Yes	Mild	Bronchial	Yes	No	Yes	Yes	No	No			Negative	No	Negative	No		Primary lungworm	No	No		Yes		No	No	No significant findings	No
Case	Yes	MET-20110522-LA001	LA	Jefferson	Yes	2011-05-22	2011	121	Male	Fresh dead	0.695	No	No	Abnormal	No			No		No		Present	Yes	Mild	Bronchial	Yes	No	Yes	No	Yes	No			Negative	No	Negative	No		Primary lungworm	No	No		No		No	Yes	No significant findings	No
Case	Yes	MCT-20110608-LA001	LA	Jefferson	Yes	2011-06-08	2011	218	Male	Alive (died thereafter)	0.373	No	Yes	Abnormal	Yes	Moderate	Yes	Yes	Mild	No		Absent	Yes	Mild	Bronchial	Yes	No	No	No	Yes	No			Negative	Yes	Negative	No		Primary bacterial	Yes	No		No		No	Yes	No significant findings	No
Case	Yes	BCF-20110706-LA001	LA	Terrebonne	No	2011-07-06	2011	257	Male	Alive (died thereafter)				Abnormal	Yes	Moderate	Yes	Yes	Moderate	No		Absent	Yes	Moderate	Bronchial	Yes	No	Yes	No	Yes	No			Negative	Yes	Negative	No		Bacterial and aspiration	No			No			Yes	No significant findings	No
Case	Yes	09DISL070811	AL	Mobile	No	2011-07-08	2011	133	Male	Fresh dead	0.452	No	No	Abnormal	No			No		No		Absent	Yes	Severe	Both	No	No	Yes	Yes	No	Yes	Morbillivirus	Morbillivirus	Positive	No	Negative	No		Primary viral	No	Yes	Severe	Yes	Moderate	Yes	No	Abnormal	Yes	Moderate
Case	Yes	BCF-20110815-LA001	LA	Lafourche	Yes	2011-08-15	2011	161	Male	Fresh dead	0.976	Yes	No	Abnormal	Yes	Moderate	Yes	No		Yes	Chronic	Present	Yes	Moderate	Both	No	Yes	Yes	Yes	Yes	Yes	Morbillivirus	Morbillivirus	Positive	No	Negative	No		Primary viral	No	Yes	Moderate	Yes	Marked	Yes	No	No significant findings	No
Case	Yes	124IMMS091411	MS	Hancock	No	2011-09-14	2011	181	Male	Fresh dead				Abnormal	No			No		No		Present	Yes	Mild	Bronchial	Yes	No	No	No	No	Yes	Morbillivirus	Morbillivirus	Positive	No	Negative	No		Primary viral	No			Yes	Moderate			No significant findings	No
Case	Yes	MCT-20111007-LA001	LA	Cameron	No	2011-10-07	2011	240	Male	Alive (died thereafter)	1.18	Yes	No	Abnormal	Yes	Mild	No	Yes	Mild	Yes	Active	Absent	Yes	Severe	Bronchial	Yes	No	Yes	Yes	Yes	No		Morbillivirus	Positive	Yes	Negative	Yes	Zygomycete	Mixed bacterial, fungal, viral	No	Yes	Moderate	Yes	Mild	Yes	No	Abnormal	Yes	Moderate
Case	Yes	MMM-20111017-LA001	LA	St. Bernard	No	2011-10-17	2011	240	Male	Fresh dead	0.283	No	Yes	Abnormal	Yes	Severe	Yes	Yes	Moderate	Yes	Chronic	Absent	Yes	Moderate	Both	No	No	Yes	Yes	No	No			Negative	No	Negative	No		Primary lungworm	No	No		No		No	No	No significant findings	No
Case	Yes	131IMMS102811	MS	Harrison	No	2011-10-28	2011	195	Male	Fresh dead	0.746	No	No	Abnormal	Yes	Mild	No	No		No		Absent	Yes	Mild	Both	No	Yes	Yes	Yes	No	No			Negative	No	Negative	Yes	Unknown	Primary lungworm	No	No		No		No	Yes	No significant findings	No
Case	Yes	BJH-20111103-LA001	LA	Plaquemines	Yes	2011-11-03	2011	192	Male	Fresh dead	0.274	No	Yes	Abnormal	Yes	Mild	No	No		No		Absent	Yes	Mild	Bronchial	Yes	Yes	Yes	Yes	No	No			Negative	No	Negative	No		Primary lungworm	No	No		No		No	No	No significant findings	No
Case	Yes	SMM-20111211-LA001	LA	Jefferson	Yes	2011-12-11	2011	229	Female	Fresh dead	0.546	No	No	Abnormal	Yes	Moderate	Yes	No		No		Absent	Yes	Severe	Both	No	No	Yes	Yes	Yes	No			Negative	Yes	Negative	No		Primary bacterial	Yes	Yes	Mild	No		No	Yes	No significant findings	No
Case	Yes	147IMMS123111	MS	Harrison	No	2011-12-31	2011	220	Female	Fresh dead	0.82	No	No	Abnormal	No			No		No		Absent	Yes	Severe	Bronchial	Yes	No	Yes	No	Yes	No			Negative	Yes		No		Primary bacterial	Yes	No						No significant findings	No
Case	Yes	02IMMS010912	AL	Baldwin	No	2012-01-09	2012	235	Male	Alive (died thereafter)	0.532	No	No	Abnormal	Yes	Moderate	Yes	Yes	Moderate	Yes	Chronic	Absent	Yes	Mild	Bronchial	Yes	No	Yes	Yes	No	No			Negative	No	Negative	No		Primary lungworm	No	No		No		No	Yes	Abnormal	Yes	Moderate
Case	Yes	BCF-20120117-LA001	LA	Jefferson	Yes	2012-01-17	2012	220	Male	Fresh dead	0.321	No	Yes	Abnormal	Yes	Moderate	Yes	Yes	Mild	Yes	Active	Present	Yes	Mild	Bronchial	Yes	Yes	Yes	No	Yes	No			Negative	No	Negative	No		Primary lungworm	No	No						No significant findings	No
Case	Yes	BCF-20120217-LA002	LA	Jefferson	Yes	2012-02-17	2012	259	Male	Fresh dead	0.261	No	Yes	Abnormal	Yes	Mild	No	Yes	Moderate	No		Absent	Yes	Moderate	Bronchial	Yes	No	Yes	Yes	Yes	No			Negative	Yes	Negative	No		Mixed bacterial and lungworm	No	No		No		No	No	No significant findings	No
Case	Yes	SMM-20120225-LA001	LA	Jefferson	Yes	2012-02-25	2012	236	Female	6 (2 at exam)	0.281	No	Yes	Abnormal	Yes	Severe	Yes	Yes	Moderate	No		Absent	No			No	No	No	No	No	No			Negative	No	Negative	No			No	No		No		No	No	Abnormal	Yes	Mild
Case	Yes	LFH-20120314-LA001	LA	Jefferson	Yes	2012-03-14	2012	248	Male	Unknown (but characterized fresh dead during gross examination)				Abnormal	Yes	Mild	No	Yes	Mild	Yes	Chronic	Present	Yes	Mild	Interstitial	No	No	Yes	Yes	No	No			Negative	No	Negative	No		Primary lungworm	No	No		No		No	No	No significant findings	No
Case	Yes	11DISL040512	AL	Baldwin	No	2012-04-05	2012	175	Male	Fresh dead	0.619	No	No	Abnormal	Yes	Mild	No	Yes	Mild	No		Present	Yes	Mild	Bronchial	Yes	Yes	Yes	Yes	No	No			Negative	No		No		Primary lungworm	No	No						No significant findings	No
Case	Yes	29IMMS042512	MS	Hancock	No	2012-04-25	2012	239	Male	Fresh dead	0.584	No	No	Abnormal	Yes	Severe	Yes	Yes	Mild	No		Absent	Yes	Severe	Both	No	No	Yes	No	Yes	No			Negative	Yes	Negative	No		Primary bacterial	Yes	Yes	Moderate					No significant findings	No
Case	Yes	AJW-20120727-LA001	LA	Plaquemines	Yes	2012-07-27	2012	251	Male	Alive (died thereafter)				Abnormal	Yes	Mild	No	Yes	Mild	Yes	Chronic	Absent	Yes	Mild	Bronchial	Yes	Yes	Yes	No	No	No			Negative	No	Negative	No		Primary lungworm	No	No		Yes		No	No	Abnormal	Yes	Severe
Case	Yes	JSH-20120730-LA001	LA	Lafourche	Yes	2012-07-30	2012	175	Female	Fresh dead	0.228	No	Yes	Abnormal	No			No		No		Present	Yes	Moderate	Bronchial	Yes	No	Yes	No	Yes	No			Negative	Yes	Negative	No		Primary bacterial	Yes	No		Yes	Mild	No	Yes	No significant findings	No
Case	Yes	JSH-20120922-LA002	LA	Jefferson	Yes	2012-09-22	2012	278	Male	Fresh dead	0.668	No	No	Abnormal	Yes	Mild	No	Yes	Mild	Yes	Active	Present	Yes	Mild	Bronchial	Yes	No	Yes	Yes	No	No			Negative	No	Negative	No		Primary lungworm	No	No		No		No	Yes	No significant findings	No
Case	Yes	21DISL101012	AL	Mobile	No	2012-10-10	2012	228	Male	Fresh dead				Abnormal	Yes	Mild	No	Yes	Mild	No		Present	Yes	Mild	Bronchial	Yes	Yes	Yes	Yes	Yes	No			Negative	No	Negative	No		Primary lungworm	No	No						No significant findings	No
Case	Yes	40IMMS102612	MS	Jackson	No	2012-10-26	2012	236	Female	Fresh dead	0.454	No	No	Abnormal	Yes	Moderate	Yes	Yes	Moderate	No		Absent	Yes	Mild	Both	No	No	No	Yes	Yes	No			Negative	No		No		Unknown	No	No		No		No	Yes	No significant findings	No
Case	Yes	LFH-20121028-LA001	LA	Jefferson	Yes	2012-10-28	2012	175	Female	Fresh dead	0.588	No	No	Abnormal	Yes	Mild	No	No		No		Present	Yes	Mild	Bronchial	Yes	No	Yes	Yes	Yes	No			Positive	Yes	Negative	No		Mixed lungworm and bacterial	No	No		No		No	No	No significant findings	No
Case	Yes	26DISL110912	AL	Baldwin	No	2012-11-09	2012	247	Female	Fresh dead	0.723	No	No	Abnormal	No			No		No		Present	Yes	Mild	Bronchial	Yes	No	No	Yes	No	No			Negative	No	Negative	No		Primary lungworm	No			Yes	Marked		No	No significant findings	No
Case	Yes	44IMMS110912	MS	Jackson	No	2012-11-09	2012	213	Male	Fresh dead	0.252	No	Yes	Abnormal	Yes	Mild	No	No		No		Absent	Yes	Mild	Interstitial	No	Yes	No	Yes	No	No			Negative	No		No		Primary lungworm	No	No		No		No	No	No significant findings	No
Case	Yes	51IMMS122812	MS	Hancock	No	2012-12-28	2012	213	Female	Fresh dead				Abnormal	Yes	Mild	No	Yes	Mild	No		Absent	Yes	Severe	Both	No	No	No	No	Yes	No			Negative	Yes		No		Primary bacterial	Yes	No		No		No	No	No significant findings	No
References	No	SC-96-14	SC	Charleston	No	1996-04-17	1996	241	Female	Fresh dead				Abnormal	No			Yes	Moderate	No		Present	Yes	Mild	Interstitial	No	Yes	No	Yes	No	No				No		No		Primary lungworm	No			No			Yes	Abnormal	No
References	No	SC-96-25	SC	Beaufort	No	1996-05-30	1996	175	Female	Fresh dead				Abnormal	No					No		Present	Yes	Mild			Yes	Yes	Yes	No	No				No		No		Primary lungworm	No	No		No		No	Yes	No significant findings	No
References	No	SC-96-30	SC	Charleston	No	1996-08-23	1996	145	Female	Fresh dead				Abnormal	No					Yes	Active	Present	Yes	Severe	Both	No	Yes	Yes	No	No									Primary lungworm	No			No			Yes
References	No	SC-96-31	SC	Colleton	No	1996-08-28	1996	169	Male	Fresh dead				Abnormal	No			Yes	Moderate	No		Present	Yes	Moderate	Bronchial	Yes	Yes	No	No	No	No				No		No		Primary lungworm	No			No			Yes
References	No	SC-97-13	SC	Horry	No	1997-03-21	1997	249	Female	Fresh dead				Abnormal	No			Yes	Mild	No		Absent	Yes	Mild	Interstitial	No	No	No	Yes	No	No				No		No		Primary lungworm	No	No		No		No	No
References	No	SC-97-33	SC	Beaufort	No	1997-07-09	1997	122	Female	Fresh dead				Abnormal	No					No		Present	Yes	Moderate	Interstitial	No	Yes	Yes	Yes	No	No				No		No		Primary lungworm	No			No			No	No significant findings	No
References	No	SC-97-50	SC	Charleston	No	1997-11-12	1997	236	Male	Fresh dead				Abnormal	No			Yes	Moderate	No		Absent	No			No	No	No	No	No	No				No		No			No
References	No	SC-97-51	SC	Charleston	No	1997-11-13	1997	244	Female	Fresh dead				Abnormal	No			Yes	Moderate	No		Absent	No			No	No	No	No	No	No				No		No			No			No			No
References	No	SC-98-13	SC	Charleston	No	1998-03-21	1998	225	Female	Fresh dead				Abnormal	No					Yes	Active	Present	Yes	Moderate	Both	No					No				No		No		Primary protozoal	No	Yes	Moderate	Yes		Yes	No	Abnormal	Yes	Mild
References	No	SC-98-17	SC	Beaufort	No	1998-04-11	1998	153	Male	Fresh dead				Abnormal	No					No		Absent	Yes												Yes		No				Yes	Moderate	Yes		Yes	No	Abnormal	No
References	No	SC-98-32	SC	Charleston	No	1998-06-17	1998	135	Female	Fresh dead				Abnormal	No					Yes	Active	Present	Yes	Mild	Interstitial	No					No				Yes		No		Mixed bacterial and lungworm	No							No significant findings	No
References	No	SC-01-01	SC	Charleston	No	2001-01-06	2001	172	Female	Fresh dead				Abnormal	No					No		Present	Yes	Mild	Interstitial	No	Yes	Yes	Yes	No	No				No		No		Primary lungworm	No			No			Yes	No significant findings	No
References	No	SC-01-50	SC	Berkeley	No	2001-07-15	2001	132	Male	Fresh dead				Abnormal	No					Yes	Chronic	Present	Yes	Mild	Interstitial	No	Yes	No	Yes	No	No				No		No		Primary lungworm	No			No			Yes	No significant findings	No
References	No	SC-01-58	SC	Beaufort	No	2001-09-05	2001	203	Male	Alive (died thereafter)				Abnormal	No			Yes	Moderate	No		Absent	Yes	Mild	Interstitial	No	Yes	No	Yes	No	No				No	Negative	No		Primary lungworm	No	No		No		No	Yes	No significant findings	No
References	No	SC0203	SC	Charleston	No	2002-02-01	2002	206	Male	Fresh dead				Abnormal	No			Yes	Moderate	No		Present	Yes	Mild	Interstitial	No	Yes	No	Yes	No	No				No	Negative	No		Primary lungworm	No			No			Yes
References	Yes	MML-0203	FL	Sarasota	No	2002-02-21	2002	227	Male	Fresh dead	0.37	No	Yes	Abnormal	No			Yes	Mild	No		Absent	Yes	Mild	Bronchial	Yes	No	Yes	No	Yes	No				No		No		Primary lungworm	No			No			No	No significant findings	No
References	Yes	MML-0204	FL	Sarasota	No	2002-02-22	2002	228	Female	Fresh dead				Abnormal	Yes	Moderate	Yes	Yes	Moderate	Yes	Chronic	Absent	Yes	Mild	Bronchial	Yes	No	Yes	Yes	No	No				No		No		Primary lungworm	No	No		No		No	Yes	No significant findings	No
References	Yes	MML-0208	FL	Sarasota	No	2002-02-28	2002	195	Male	Fresh dead	0.462	No	No	Abnormal	Yes	Moderate	Yes	Yes	Moderate	No		Present	Yes	Moderate	Bronchial	Yes	No	Yes	No	Yes	No				Yes		No		Mixed lungworm and bacteria	No			No			Yes	No significant findings	No
References	No	MML-0223	FL	Manatee	No	2002-06-28	2002	130	Male	Fresh dead				Abnormal	No					No		Present	Yes	Mild	Bronchial	Yes					No				No		No		Primary lungworm	No
References	Yes	MML-0226	FL	Sarasota	No	2002-07-18	2002	116	Male	Fresh dead	0.52	No	No	Abnormal	No			No		No		Present	Yes	Moderate	Bronchial	Yes					No				Yes		No		Mixed lungworm and bacteria	No			No			No	No significant findings	No
References	No	SC0216	SC	Charleston	No	2002-07-23	2002	220	Female	Fresh dead				Abnormal	Yes	Severe	Yes			No		Present	Yes	Severe			Yes	Yes	Yes	No	No				No		No		Primary lungworm	No			No			No	Abnormal	Yes	Severe
References	No	SC0223	SC	Berkeley	No	2002-08-22	2002	201	Female	Alive (died thereafter)				Abnormal	No			Yes	Moderate	No		Present	Yes	Moderate	Interstitial	No	Yes	No	Yes	No	No				No		No		Primary lungworm	No			No			Yes	No significant findings	No
References	Yes	MML-0235	FL	Sarasota	No	2002-10-30	2002	243	Female	Alive (died thereafter)	0.565	No	No	Abnormal	Yes	Mild	No	Yes	Mild	Yes	Chronic	Present	Yes	Mild	Bronchial	Yes	Yes	Yes	No	Yes	No				No		Yes	Aspergillus	Mixed lungworm and fungal	No	Yes	Mild	No		No	No	No significant findings	No
References	Yes	MML0236	FL	Sarasota	No	2002-11-04	2002	278	Male	Alive (died thereafter)	0.616	No	No	Abnormal	Yes	Moderate	Yes	Yes	Moderate	Yes	Chronic	Present	Yes	Mild	Both	No	Yes	Yes	Yes	No	No				No		No		Primary lungworm	No	No		No		No	No	No significant findings	No
References	Yes	MML0305	FL	Charlotte	No	2003-02-14	2003	171	Female	Fresh dead	0.613	No	No	Abnormal	Yes	Mild	No	Yes	Mild	Yes	Chronic	Present	Yes	Mild	Bronchial	Yes	No	Yes	Yes	No	No				No		No		Primary lungworm	No	No		No		No	No	No significant findings	No
References	Yes	GA1212	TX	Galveston	No	2003-02-21	2003	255	Male	Fresh dead	0.613	No	No	Abnormal	Yes	Mild	No	Yes	Moderate	Yes	Active	Present	Yes	Moderate	Bronchial	Yes	No	Yes	Yes	Yes	No				Yes		No		Mixed lungworm and bacterial	No	No		No		No	No	No significant findings	No
References	No	SC0305	SC	Charleston	No	2003-03-12	2003	245	Male	Fresh dead				Abnormal	No			Yes	Moderate	No		Absent	Yes	Moderate	Interstitial	No					No				No		No		Primary lungworm	No	No		Yes		No	No
References	Yes	GA1239	TX	Chambers	No	2003-04-05	2003	245	Female	Fresh dead	0.587	No	No	Abnormal	Yes	Mild	No	Yes	Moderate	Yes	Active	Present	Yes	Moderate	Both	No	No	Yes	Yes	Yes	No				No		No		Primary lungworm	No	No		No		No	Yes	No significant findings	No
References	Yes	MML0319	FL	Manatee	No	2003-04-29	2003	167	Male	Fresh dead	0.629	No	No	Abnormal	No			No		Yes	Chronic	Present	Yes	Moderate	Bronchial	Yes	No	Yes	Yes	Yes	No				No		Yes	Aspergillus	Mixed lungworm and fungal	No			No			No	No significant findings	No
References	Yes	GA1244	TX	Galveston	No	2003-06-13	2003	259	Male	Alive (died thereafter)	0.325	No	Yes	Abnormal	Yes	Mild	No	Yes	Moderate	Yes	Active	Present	Yes	Moderate	Bronchial	Yes	No	Yes	Yes	Yes	No				No		No		Primary lungworm	No	No		No		No	No	No significant findings	No
References	Yes	GA1247	TX	Chambers	No	2003-08-14	2003	231.5	Male	Fresh dead	0.552	No	No	Abnormal	Yes	Mild	No	No		No		Present	Yes	Moderate	Bronchial	Yes	No	Yes	Yes	Yes	No				Yes		No		Mixed lungworm and bacterial	No	No		No		No	No
References	No	SC0322	SC	Charleston	No	2003-08-17	2003	175	Male	Alive (died thereafter)				Abnormal	No					No		Present	Yes	Mild							No				No	Negative	No		Primary lungworm	No	No		Yes		No	No	No significant findings	No
References	No	SC0332	SC	Horry	No	2003-11-10	2003	176	Male	Fresh dead				Abnormal	No					No		Absent	Yes	Severe	Bronchial	Yes					Yes	Morbillivirus	Morbillivirus		Yes	Negative	No		Mixed viral and bacterial	No	Yes	Moderate	Yes		Yes	No	No significant findings	No
References	Yes	CC208	TX	Kenedy	No	2003-11-13	2003	233	Female	Alive (died thereafter)	0.47	No	No	Abnormal	Yes	Mild	No	Yes	Mild	No		Absent	Yes	Mild	Both	No	No	Yes	Yes	Yes	No				No		No		Primary lungworm	No	No		No		No	No	No significant findings	No
References	No	SC0335	SC	Horry	No	2003-11-17	2003	255	Male	Alive (died thereafter)				Abnormal	No			Yes	Moderate	No		Absent	Yes	Mild							No				No	Negative	No		Primary lungworm	No	Yes	Mild	Yes		Yes	No	No significant findings	No
References	Yes	GA1248	TX	Galveston	No	2003-11-19	2003	275	Male	Alive (died thereafter)	0.494	No	No	Abnormal	No			No		No		Present	Yes	Mild	Bronchial	Yes	Yes	No	Yes	No	No				No		No		Primary lungworm	No	No		No		No	Yes	Abnormal	Yes	Moderate
References	Yes	MML0338	FL	Lee	No	2003-11-29	2003	162	Male	Fresh dead	0.587	No	No	Abnormal	Yes	Mild	No	No		Yes	Chronic	Present	No			No	No	No	No	No	No				No		No		Primary lungworm	No			No			Yes	No significant findings	No
References	Yes	MML0339	FL	Charlotte	No	2003-12-13	2003	190	Male	Fresh dead	0.404	No	Yes	Abnormal	No					Yes	Chronic	Present	Yes	Mild	Both	No					No				No		No		Primary lungworm	No	No		No		No	No
References	No	SC0401	SC	Charleston	No	2004-01-11	2004	138	Male	Fresh dead				Abnormal	No					No		Absent	No			No	No	No	No	No	No				No	Negative	No			No	Yes	Mild	Yes		Yes	No	No significant findings	No
References	No	SC0403	SC	Charleston	No	2004-01-27	2004	228	Female	Fresh dead				Abnormal	Yes	Moderate	Yes			No		Absent	Yes	Moderate	Interstitial	No					No				No	Negative	No				Yes	Moderate	Yes		Yes		No significant findings	No
References	No	MML-0409	FL	Charlotte	No	2004-05-11	2004	246	Female	Fresh dead				Abnormal	Yes	Moderate	Yes	Yes	Moderate	No		Present	Yes	Mild	Bronchial	Yes	No	Yes	Yes	No	No				No	Negative	No		Primary lungworm	No			No			No
References	No	SC0414	SC	Charleston	No	2004-05-15	2004	190	Female	Fresh dead				Abnormal	Yes	Moderate	Yes			Yes	Chronic	Present	Yes	Moderate	Both	No	No	Yes	Yes	No	No				No	Negative	No		Primary lungworm	No	Yes	Mild	Yes		Yes	No	Abnormal	No
References	No	SC0426	SC	Beaufort	No	2004-07-01	2004	158	Male	Fresh dead				Abnormal	No					No		Absent	No			No	No	No	No	No	No				No	Negative	No			No			No			No	No significant findings	No
References	Yes	KMS362	NC	Dare	No	2004-07-31	2004	273	Female	Alive (died thereafter)	0.972	Yes	No	Abnormal	No					No		Absent	No			No	No	No	No	No	No				No		No			No	Yes	Moderate					Abnormal	Yes	Moderate
References	Yes	MML-0413	FL	Manatee	No	2004-08-03	2004	250	Female	Fresh dead	0.887	Yes	No	Abnormal	Yes	Moderate	Yes	Yes	Mild	No		Present	Yes	Mild	Both	No	No	No	Yes	Yes	No				No	Negative	No		Primary lungworm	No	No		No		No	No	No significant findings	No
References	Yes	KMS365	NC	Dare	No	2004-08-06	2004	267	Male	Alive (died thereafter)	0.559	No	No	Abnormal	No					No		Absent	Yes	Moderate	Bronchial	Yes					Yes	Morbillivirus			No		No		Primary viral	No	Yes	Mild					Abnormal	Yes	Severe
References	Yes	SC0431	SC	Charleston	No	2004-08-11	2004	227	Female	Alive (died thereafter)				Abnormal	Yes	Moderate	Yes	Yes	Moderate	No		Present	Yes	Moderate	Bronchial	Yes	Yes	Yes	No	No	No				No	Negative	No		Primary lungworm	No	No		No		No		Abnormal	Yes	Moderate
References	Yes	SC0432	SC	Horry	No	2004-08-15	2004	284	Female	Alive (died thereafter)				Abnormal	No					No		Absent	Yes	Mild	Interstitial	No					No				No	Negative	No		Primary lungworm	No	No		No		No		Abnormal	Yes	Moderate
References	Yes	GA1292	TX	Galveston	No	2004-08-28	2004		Male	Alive (died thereafter)				Abnormal	Yes	Moderate	Yes	Yes	Mild	No		Absent	Yes	Severe	Both	No	No	Yes	No	No	No				No		Yes	Zygomycete	Primary fungal	No	No		No		No	No	No significant findings	No
References	Yes	MML-0416	FL	Charlotte	No	2004-09-12	2004	267	Female	Fresh dead	0.584	No	No	Abnormal	Yes	Mild	No	Yes	Mild	No		Present	Yes	Mild	Bronchial	Yes	No	Yes	No	Yes	No				Yes	Negative	No		Lungworm plus other	No	No		No		No	No	No significant findings	No
References	Yes	MML-0501	FL	Manatee	No	2005-01-24	2005	200	Male	Fresh dead	0.447	No	No	Abnormal	Yes	Mild	No	Yes	Mild	No		Present	Yes	Mild	Both	No	Yes	Yes	No	No	No				No		No		Primary lungworm	No	No		No		No	No	No significant findings	No
References	Yes	MML-0502	FL	Lee	No	2005-01-27	2005	255	Male	Fresh dead	0.55	No	No	Abnormal	Yes	Mild	No	Yes	Mild	No		Present	Yes	Mild	Interstitial	No	Yes	No	No	No	No				No		No		Primary lungworm	No	No		No		No	No
References	Yes	MML-0503	FL	Charlotte	No	2005-02-05	2005	186	Male	Fresh dead	0.588	No	No	Abnormal	Yes	Mild	No	No		No		Present	Yes	Moderate	Both	No	No	Yes	Yes	Yes	No				Yes		No		Primary bacterial	Yes	No		No		No	Yes	No significant findings	No
References	Yes	SC0506	SC	Beaufort	No	2005-03-24	2005	239	Female	Fresh dead	0.794	No	No	Abnormal	Yes	Moderate	Yes	Yes	Mild	No		Absent	No			No	No	No	No	No	No				No	Negative	No			No	No		No		No		No significant findings	No
References	No	SC0507	SC	Beaufort	No	2005-03-26	2005	150	Male	Fresh dead				Abnormal	No					No		Absent	No			No	No	No	No	No	No				No		No			No			No				Abnormal	Yes	Mild
References	Yes	FMMSN-0505	FL	Lee	No	2005-04-08	2005	122	Male	Alive (died thereafter)	0.729	No	No	Abnormal	No			No		No		Present	Yes	Mild	Bronchial	Yes	No	Yes	No	Yes	No				No		No		Primary lungworm	No	No		No		No	Yes	No significant findings	No
References	No	SC0518	SC	Beaufort	No	2005-05-22	2005	244	Female	Alive (died thereafter)				Normal	No			No		No		Absent	No			No	No	No	No	No	No				No	Negative	No			No			No			No	No significant findings	No
References	No	MMPL-0512	FL	Pinellas	No	2005-08-19	2005	227	Male	Fresh dead				Abnormal	No					Yes	Chronic	Present	Yes	Severe	Both	No	No	No	No	No	No				Yes		No		Mixed bacterial and lungworm	No	No						Abnormal	No
References	Yes	GA1335	TX	Galveston	No	2005-08-26	2005	199	Male	Alive (died thereafter)	0.55	No	No	Abnormal	No			No		No		Present	Yes	Mild	Bronchial	Yes	No	Yes	Yes	Yes	No				No		No		Primary lungworm	No	No		No		No	No	No significant findings	No
References	Yes	MMPL-0516	FL	Pinellas	No	2005-09-14	2005	206	Male	Fresh dead	0.512	No	No	Abnormal	Yes	Moderate	Yes			No		Absent	No			No	No	No	No	No	No				No		No			No
References	Yes	MMPL-0520	FL	Pinellas	No	2005-10-21	2005	202	Male	Fresh dead	0.504	No	No	Abnormal	Yes	Moderate	Yes	Yes	Moderate	Yes	Active	Present	Yes	Mild	Both	No	Yes	Yes	No	Yes	No				No		No		Mixed lungworm and viral	No	No						No significant findings	No
References	No	PCNMFS-05-05	FL	Bay	No	2005-11-01	2005	203	Male	Fresh dead				Abnormal	Yes	Moderate	Yes			No		Absent	Yes	Mild	Interstitial	No					No				No		No		Primary lungworm	No	No						Abnormal	No
References	No	PCNMFS-05-12	FL	Walton	No	2005-12-05	2005	239	Female	Fresh dead				Abnormal	Yes	Moderate	Yes			No		Present	Yes	Moderate	Interstitial	No					No				No		No		Primary lungworm	No	No
References	No	SC0545	SC	Charleston	No	2005-12-12	2005	210	Male	Fresh dead				Abnormal	No					No		Present	Yes	Mild	Interstitial	No	Yes	No	Yes	No	No				No	Negative	No		Primary lungworm	No							No significant findings	No
References	No	MMPL-0530	FL	Pinellas	No	2005-12-13	2005	229	Female	Fresh dead				Abnormal	Yes	Moderate	Yes	Yes	Moderate	No		Absent	No			No	No	No	No	No	No				No		No			No	No						Abnormal	No
References	No	PCNMFS-05-13	FL	Walton	No	2005-12-13	2005	224	Male	Fresh dead				Abnormal	Yes	Moderate	Yes			No		Absent	Yes	Mild	Interstitial	No					No				No		No		Primary lungworm	No	No						Abnormal	No
References	Yes	FMMSN-0535	FL	Lee	No	2005-12-15	2005	253	Female	Fresh dead	0.895	Yes	No	Abnormal	Yes	Mild	No	Yes	Mild	No		Present	Yes	Mild	Both	No	No	Yes	Yes	No	No				No	Negative	No		Primary lungworm	No	No		No		No	No	No significant findings	No
References	Yes	FMMSN-0601	FL	Lee	No	2006-01-09	2006	206	Female	Fresh dead	0.64	No	No	Abnormal	Yes	Mild	No	Yes	Mild	Yes		Present	No			No	No	No	No	No	No				No		No			No	No		No		No	Yes
References	Yes	FMMSN-0602	FL	Charlotte	No	2006-01-12	2006	151	Female	Fresh dead	0.838	No	No	Abnormal	Yes	Mild	No	No		Yes	Chronic	Present	Yes	Moderate	Both	No	No	Yes	Yes	Yes	No				No		No		Primary lungworm	No	No		No		No	Yes	Abnormal	No
References	Yes	GW06001D	FL	Gulf	No	2006-01-12	2006	252	Female	Alive (died thereafter)	0.753	No	No	Abnormal	Yes	Mild	No	Yes	Mild	No		Absent	Yes	Mild	Interstitial	No					No				No		No		Primary lungworm	No	No						Abnormal	Yes	Mild
References	Yes	MML-0604	FL	Manatee	No	2006-02-09	2006	156	Male	Fresh dead	0.447	No	No	Abnormal	Yes	Mild	No	No		Yes	Chronic	Present	Yes	Mild	Both	No	No	Yes	Yes	No	No				No		No		Primary lungworm	No	No		No		No	No	No significant findings	No
References	Yes	MMPL-0606	FL	Hillsborough	No	2006-02-17	2006	256	Male	Fresh dead				Abnormal	Yes	Moderate	Yes			Yes	Chronic	Present	Yes	Mild	Both	No	No	Yes	Yes	No	No				No		No		Primary lungworm	No
References	Yes	MMPL-0607	FL	Pinellas	No	2006-02-26	2006	249	Female	Fresh dead	0.512	No	No	Abnormal	Yes	Moderate	Yes	Yes	Moderate	Yes	Active	Present	Yes	Moderate	Bronchial	Yes	No	Yes	Yes	No	No				No		No		Primary lungworm	No	No						Abnormal	No
References	Yes	MML-0606	FL	Sarasota	No	2006-03-03	2006	263	Male	Fresh dead	0.541	No	No	Abnormal	Yes	Moderate	Yes	Yes	Moderate	No		Absent	No			No	No	No	No	No	No				No		No			No	No		No		No	No	No significant findings	No
References	Yes	MML-0608	FL	Sarasota	No	2006-04-01	2006	205	Female	Alive (died thereafter)	0.504	No	No	Abnormal	Yes	Mild	No	Yes	Mild	No		Present	Yes	Mild	Bronchial	Yes	No	Yes	No	Yes	No				No	Positive	No		Primary lungworm	No	No		No		No	Yes	Abnormal	Yes	Severe
References	No	PCNMFS06-19	FL	Okaloosa	No	2006-04-01	2006	155	Male	Fresh dead				Abnormal	Yes	Mild	No			No		Absent	Yes	Mild	Interstitial	No					No				No		No		Primary lungworm	No	No
References	No	PCNMFS06-21	FL	Bay	No	2006-04-07	2006	216	Male	Fresh dead				Abnormal	Yes	Mild	No			No		Present	Yes	Moderate	Both	No					No				No		No		Primary lungworm	No	No						No significant findings	No
References	Yes	MML-0609	FL	Sarasota	No	2006-04-12	2006	238	Female	Fresh dead	0.582	No	No	Abnormal	Yes	Moderate	Yes	Yes	Severe	No		Present	Yes	Mild	Bronchial	Yes	Yes	No	Yes	No	No				No		No		Primary lungworm	No	No		No		No	No	No significant findings	No
References	Yes	MML-0611	FL	Manatee	No	2006-05-01	2006	241	Female	Fresh dead	0.652	No	No	Abnormal	Yes	Moderate	Yes	Yes	Mild	Yes	Chronic	Present	Yes	Mild	Bronchial	Yes	No	Yes	Yes	No	No				No		No		Primary lungworm	No			No			No	No significant findings	No
References	No	PCNMFS06-25	FL	Franklin	No	2006-06-22	2006	180	Female	Fresh dead				Abnormal	No					No		Present	Yes	Moderate	Bronchial	Yes					No				No		No		Primary lungworm	No
References	Yes	MMPL-0609	FL	Hillsborough	No	2006-07-06	2006	257	Male	Fresh dead	1.04	Yes	No	Abnormal	Yes	Mild	No	Yes	Mild	No		Present	Yes	Mild	Bronchial	Yes	Yes	No	No	No	No				No		No		Primary lungworm	No	No		No		No	No	No significant findings	No
References	No	PCNMFS06026	FL	Wakulla	No	2006-07-07	2006	265	Female	Fresh dead				Abnormal	Yes	Moderate	Yes			No		Absent	Yes	Moderate	Interstitial	No					No				No		No		Primary lungworm	No	No
References	Yes	MML-0619	FL	Sarasota	No	2006-07-13	2006	255	Male	Fresh dead	0.619	No	No	Abnormal	Yes	Mild	No	Yes	Mild	No		Present	Yes	Mild	Bronchial	Yes	Yes	No	No	No	No				No		No		Primary lungworm	No	No		No		No	No	No significant findings	No
References	No	PCNMFS06-27-HA	FL	Gulf	No	2006-07-17	2006	196	Female	Fresh dead				Abnormal	No			Yes	Mild	Yes	Active	Absent	Yes	Moderate	Both	No					No				No		No		Primary lungworm	No							Abnormal	Yes	Mild
References	Yes	SC0630	SC	Beaufort	No	2006-07-28	2006	236	Male	Fresh dead	0.566	No	No	Abnormal	Yes	Moderate	Yes			Yes	Chronic	Present	Yes	Moderate	Both	No	Yes	Yes	Yes	No	No				No	Negative	No		Primary lungworm	No	No		No		No		Abnormal	No
References	No	PCNMFS06-28	FL	Bay	No	2006-08-15	2006	201	Male	Fresh dead				Abnormal	Yes	Moderate	Yes			Yes	Active	Present	Yes	Mild	Bronchial	Yes					No				No		No		Primary lungworm	No	No						No significant findings	No
References	Yes	MMPL-0615	FL	Hernando	No	2006-12-18	2006	254	Male	Fresh dead	0.594	No	No	Abnormal	Yes	Moderate	Yes	Yes	Moderate	No		Present	Yes	Mild	Interstitial	No					No				Yes		No		Mixed bacterial and lungworm	No	No						Abnormal	No
References	No	SC0704	SC	Charleston	No	2007-03-15	2007	246	Female	Fresh dead				Normal	No					No		Absent	No			No	No	No	No	No	No				No	Negative	No			No			No			No	No significant findings	No
References	Yes	SC0740	SC	Charleston	No	2007-08-18	2007	250	Male	Alive (died thereafter)	0.548	No	No	Abnormal	Yes	Moderate	Yes	Yes	Moderate	No		Absent	Yes	Mild	Interstitial	No					No				No		No		Primary lungworm	No	No		No		No		Abnormal	Yes	Mild
References	No	SC0747	SC	Charleston	No	2007-11-11	2007	234	Female	Fresh dead				Abnormal	No					Yes	Active	Present	Yes													Negative
References	No	Hubbs-0828-Tt	FL	Brevard	No	2008-05-02	2008	115	Male	Fresh dead				Abnormal	No					No		Present	Yes	Mild	Bronchial	Yes					No				No		No		Primary lungworm	No	Yes	Moderate					No significant findings	No
References	Yes	SC0834	SC	Charleston	No	2008-08-25	2008	207	Female	Fresh dead				Abnormal	Yes	Mild	No	Yes	Mild	No		Absent	Yes	Moderate	Bronchial	Yes	Yes	Yes	Yes	No	No				No	Negative	No		Primary lungworm	No			No				Abnormal	Yes	Moderate
References	No	SC0836	SC	Charleston	No	2008-09-29	2008	214	Male	Alive (died thereafter)				Abnormal	No					Yes	Active	Present	Yes	Moderate	Bronchial	Yes					No				No	Negative	No		Primary lungworm	No	No		No		No		Abnormal	No
References	No	SC0842	SC	Beaufort	No	2008-12-10	2008	210	Female	Fresh dead				Abnormal	No					No		Present	Yes	Mild	Interstitial	No	Yes	No	No	No	No				No	Negative	No		Primary lungworm	No			Yes			No	No significant findings	No
References	No	SC0845	SC	Colleton	No	2008-12-30	2008	221	Male	Fresh dead				Abnormal	No					No		Absent	No			No	No	No	No	No	No				No	Positive	No			No	No		No		No	No	No significant findings	No
References	Yes	MML-0904	FL	Manatee	No	2009-05-22	2009	235	Female	Fresh dead				Abnormal	No					No		Absent	No			No	No	No	No	No	No				No	Negative	No			No	No
References	Yes	MML0908	FL	Sarasota	No	2009-07-18	2009	207	unknown	Fresh dead	0.617	No	No	Abnormal	Yes	Mild	No	No		Yes	Chronic	Present	Yes	Moderate	Both	No	Yes	No	Yes	Yes	No				Yes	Negative	No		Mixed bacterial and lungworm	No	No		No		No	Yes	No significant findings	No
References	Yes	MML0910	FL	Sarasota	No	2009-07-27	2009	246	Female	Fresh dead	0.562	No	No	Abnormal	Yes	Mild	No	No		No		Present	No			No	No	No	No	No	No				No	Negative	No			No	No		No		No	No	No significant findings	No
References	No	SC0940	SC	Georgetown	No	2009-08-09	2009	164	Female	Fresh dead				Abnormal	No					No		Absent	Yes	Mild			No	Yes	No	Yes	No				Yes	Negative	No		Primary bacterial	Yes	No		No		No	No	Abnormal	No
References	No	SC1040	SC	Beaufort	No	2010-06-23	2010	126	Male	Fresh dead				Abnormal	Yes	Severe	Yes			Yes	Active	Present	Yes	Severe	Bronchial	Yes					No				Yes	Negative	No		Mixed bacteral and lungworm	No	No		Yes		No		No significant findings	No
References	No	SC1046	SC	Horry	No	2010-07-11	2010	190	Male	Alive (died thereafter)				Abnormal	Yes					No		Absent	No			No	No	No	No	No	No				No	Positive	No			No			No				Abnormal	No
References	No	SC1067	SC	Beaufort	No	2010-12-09	2010	168	Male	Fresh dead				Abnormal	Yes	Mild	No			No		Present	Yes	Mild	Interstitial	No	Yes	No	Yes	No	No				No	Negative	No		Primary lungworm	No	No		No		No	No	Abnormal	No
References	No	SC1117	SC	Charleston	No	2011-03-15	2011	219	Male	Fresh dead				Abnormal	No			Yes	Mild	No		Present	Yes	Moderate	Bronchial	Yes					No					Negative					Yes	Moderate	Yes		Yes	No	Abnormal	Yes	Mild
References	No	SC1127	SC	Charleston	No	2011-04-04	2011	248	Female	Fresh dead				Abnormal	No			Yes	Mild	No		Absent	Yes	Mild	Interstitial	No					No				No	Negative	No				Yes	Severe	Yes		Yes	No	Abnormal	Yes	Mild
References	No	SC1235	SC	Beaufort	No	2012-07-29	2012	168	Male	Alive (died thereafter)				Abnormal	Yes	Moderate	Yes			Yes	Active	Absent	Yes	Moderate												Negative			Primary lungworm	No	No		No		No		Abnormal	Yes	Moderate
References	No	SC1236	SC	Georgetown	No	2012-08-02	2012	223	Male	Alive (died thereafter)				Abnormal	Yes	Moderate	Yes			No		Absent	Yes	Mild	Interstitial	No					No				No	Negative	No		Primary lungworm	No	No		No		No		Abnormal	No
[truncated: 28 more columns]
